# Supplementary material for: A Pilot Study on Across-Generation Impacts of Maternal Heat Stress on Blood Metabolites of Female Holstein Dairy Calves
Source: MDPI journal article supplement (doi:10.3390/metabo13040494), 2023-03-29
Supplement: s1 [file s1]

Supplementary Materials:

Table S1: Concentrations (µM) for all 259 metabolites. Values below the limit of detection (LOD) were replaced with < LOD.

| Calf                        | 2031  | 2037   | 2038   | 2039  | 2043   | 2044  | 2048  | 2051  | 2052   | 2056   | 2059   | 2060   | 2064   | 2065   | 2068   | 2069   | 2070   | 2078  | 2080  | 2089   | 2090  | 2102   | 2104   | 2107  | 2108   | 2109   | 2110  |        |        |        |        |        |        |        |        |        |        |        |        |        |        |        |        |        |        |        |        |      |
|-----------------------------|-------|--------|--------|-------|--------|-------|-------|-------|--------|--------|--------|--------|--------|--------|--------|--------|--------|-------|-------|--------|-------|--------|--------|-------|--------|--------|-------|--------|--------|--------|--------|--------|--------|--------|--------|--------|--------|--------|--------|--------|--------|--------|--------|--------|--------|--------|--------|------|
| mTHI class                  | 1     | 1      | 1      | 1     | 1      | 1     | 1     | 1     | 1      | 1      | 1      | 1      | 1      | 1      | 1      | 2      | 2      | 2     | 2     | 2      | 2     | 2      | 2      | 2     | 2      | 2      | 2     |        |        |        |        |        |        |        |        |        |        |        |        |        |        |        |        |        |        |        |        |      |
| Metabolite                  |       |        |        |       |        |       |       |       |        |        |        |        |        |        |        |        |        |       |       |        |       |        |        |       |        |        |       |        |        |        |        |        |        |        |        |        |        |        |        |        |        |        |        |        |        |        |        |      |
| Carnitine                   | 11.40 | 11.69  | 18.20  | 12.49 | 16.19  | 7.76  | 17.16 | 12.63 | 12.08  | 7.83   | 17.09  | 23.18  | 21.56  | 9.19   | 9.80   | 12.69  | 7.61   | 6.85  | 18.99 | 16.80  | 10.65 | 21.57  | 17.41  | 15.02 | 9.86   | 50.05  | 5.46  | 12.20  | 7.55   | 17.48  | 16.45  | 14.64  | 11.12  | 11.44  | 9.57   | 11.33  | 12.73  | 19.75  | 11.60  | 30.73  | 12.30  | 19.68  | 8.56   | 15.14  | 16.17  | 9.49   | 11.21  |      |
| Acetyl carnitine            | 1.81  | 1.56   | 2.61   | 1.42  | 1.60   | 0.99  | 2.31  | 1.94  | 1.26   | 0.98   | 2.97   | 2.59   | 1.64   | 0.96   | 1.32   | 1.75   | 1.31   | 1.15  | 2.03  | 1.63   | 1.03  | 4.09   | 1.56   | 4.56  | 0.95   | 7.84   | 0.53  | 0.95   | 0.89   | 2.02   | 0.99   | 1.19   | 1.14   | 1.04   | 0.92   | 0.91   | 1.14   | 1.40   | 2.01   | 1.29   | 2.82   | 1.64   | 2.60   | 0.84   | 1.39   | 2.05   | 1.12   | 1.12 |
| Propionyl carnitine         | 0.19  | 0.19   | 0.18   | < LOD | 0.19   | < LOD | 0.35  | < LOD | < LOD  | < LOD  | 0.27   | 0.50   | 0.34   | < LOD  | 0.19   | 0.28   | 0.14   | 0.08  | 0.25  | 0.24   | 0.10  | 0.29   | 0.18   | 0.24  | 0.13   | 0.56   | 0.07  | < LOD  | < LOD  | 0.18   | 0.19   | 0.18   | 0.25   | < LOD  | < LOD  | 0.19   | 0.33   | < LOD  | < LOD  | 0.42   | 0.26   | 0.23   | < LOD  | < LOD  | 0.27   | < LOD  | 0.23   | 0.23 |
| Butyryl carnitine           | 0.15  | 0.10   | 0.25   | 0.12  | 0.17   | 0.10  | 0.28  | 0.14  | 0.15   | 0.14   | 0.42   | 0.39   | 0.28   | 0.12   | 0.29   | 0.33   | 0.16   | < LOD | 0.28  | 0.15   | 0.10  | < LOD  | 0.55   | < LOD | 0.24   | 0.14   | 0.34  | < LOD  | 0.12   | 0.15   | 0.17   | 0.26   | 0.19   | 0.30   | 0.13   | 0.18   | 0.09   | 0.17   | 0.32   | 0.13   | 0.30   | 0.29   | 0.27   | 0.10   | 0.13   | 0.19   | 0.12   | 0.18 |
| Trimethylthiazine N-oxide   | 8.90  | 6.50   | 2.56   | 55.92 | 39.72  | 1.97  | 14.7  | 4.85  | 26.80  | 5.99   | 4.72   | 3.77   | 4.57   | 23.54  | 3.03   | 6.11   | 5.61   | 3.79  | 1.34  | 5.36   | 12.90 | 9.27   | 5.39   | 2.28  | 8.45   | 2.83   | 2.59  | 10.39  | 2.75   | 8.24   | 6.12   | 1.67   | 3.46   | 5.69   | 3.93   | 5.31   | 5.93   | 6.61   | 15.15  | 18.17  | 16.30  | 2.72   | 15.52  | 7.25   | 5.67   | 4.01   |        |      |
| 1-Methylhistidine           | 1.64  | 2.75   | 10.97  | 4.80  | 5.83   | 1.82  | 2.17  | 2.43  | 5.47   | 2.41   | 3.00   | 3.41   | 2.24   | 3.82   | 6.15   | 4.91   | 3.56   | 3.80  | 6.84  | 3.66   | 4.20  | 30.75  | 5.80   | 9.40  | 2.72   | 3.36   | 3.42  | 5.46   | 4.70   | 3.47   | 2.18   | 17.68  | 2.72   | 2.64   | 2.42   | 2.41   | 2.79   | 2.90   | 5.77   | 3.93   | 4.20   | 15.41  | 2.91   | 3.54   | 2.81   | 3.78   | 3.15   |      |
| 3-Methylhistidine           | 1.20  | 2.02   | 7.25   | 2.47  | 3.18   | 1.36  | 1.11  | 1.72  | 3.04   | 1.75   | 2.36   | 1.58   | 1.09   | 2.39   | 2.60   | 2.69   | 1.65   | 1.71  | 4.16  | 2.13   | 2.20  | 10.14  | 3.71   | 7.09  | 1.30   | 1.45   | 2.16  | 3.52   | 2.69   | 2.25   | 1.11   | 5.12   | 1.37   | 1.36   | 1.42   | 1.54   | 1.84   | 1.79   | 3.40   | 2.34   | 3.11   | 8.05   | 1.62   | 1.75   | 1.82   | 2.58   | 2.45   |      |
| 5-Aminovaleric acid         | 0.44  | 0.29   | 0.47   | 0.84  | 0.35   | 0.14  | 0.25  | 0.38  | 0.15   | 0.45   | 0.54   | 0.54   | 0.25   | 0.73   | 0.34   | 0.36   | 0.24   | 0.67  | 0.63  | 0.10   | 0.17  | 0.47   | 0.32   | 0.20  | 2.00   | 0.46   | 1.21  | 0.96   | 0.62   | 2.29   | 0.24   | 0.24   | 1.33   | 2.40   | 0.37   | 0.41   | 0.47   | 0.25   | 1.12   | 0.13   | 0.13   | 0.10   | 0.10   | 0.10   | 0.10   | 0.10   | 0.10   |      |
| α-Aminobutyric acid         | 2.44  | 2.85   | 2.29   | 9.80  | 10.68  | 4.08  | 6.85  | 3.90  | 6.73   | 2.79   | 5.76   | 7.80   | 7.20   | 6.24   | 6.14   | 1.13   | 3.80   | 6.25  | 14.77 | 8.30   | 7.46  | 5.82   | 4.70   | 3.78  | 9.34   | 5.22   | 4.24  | 11.07  | 3.80   | 4.89   | 4.44   | 2.59   | 7.05   | 3.08   | 6.17   | 4.03   | 4.85   | 14.04  | 8.50   | 8.40   | 10.30  | 7.07   | 6.31   | 4.38   | 5.29   | 6.34   | 6.88   |      |
| Asymmetric dimethylarginine | 0.93  | 1.49   | 0.65   | 1.57  | 2.58   | 0.91  | 1.84  | 1.26  | 2.08   | 1.48   | 1.75   | 1.73   | 1.35   | 1.29   | 1.84   | 1.53   | 1.36   | 1.12  | 1.15  | 2.21   | 1.45  | 0.92   | 1.72   | 1.23  | 1.42   | 1.95   | 1.25  | 2.11   | 0.62   | 1.40   | 1.05   | 0.45   | 1.71   | 1.48   | 1.46   | 1.31   | 1.79   | 2.29   | 1.90   | 2.29   | 1.70   | 1.20   | 2.04   | 1.85   | 2.14   | 2.16   | 1.78   |      |
| α-Aminoadipic acid          | 1.15  | 2.34   | 0.65   | 1.32  | 2.06   | 2.01  | 4.28  | 1.41  | 2.64   | 2.98   | 2.56   | 3.17   | 3.21   | 1.81   | 4.35   | 4.08   | 1.77   | 1.38  | 1.84  | 2.65   | 1.08  | 4.09   | 2.47   | 0.70  | 2.88   | 2.02   | 1.06  | 1.75   | 0.90   | 2.45   | 1.29   | 0.86   | 3.76   | 3.11   | 3.89   | 2.03   | 2.61   | 3.12   | 1.67   | 2.97   | 3.02   | 2.13   | 3.67   | 1.62   | 2.59   | 2.51   | 3.92   |      |
| Anserine                    | 0.20  | 0.28   | 0.29   | 0.31  | 0.28   | 0.17  | 0.20  | 0.19  | 0.24   | 0.15   | 0.27   | 0.26   | 0.14   | 0.26   | 0.24   | 0.14   | 0.24   | 0.19  | 0.21  | 0.26   | 0.23  | 0.33   | 0.25   | 0.31  | 0.23   | 0.25   | 0.27  | 0.23   | 0.13   | 0.13   | 0.37   | 0.21   | 0.21   | 0.27   | 0.18   | 0.12   | 0.20   | 0.13   | 0.53   | 0.22   | 0.27   | 0.35   | 0.26   | 0.25   | 0.38   | 0.31   | 0.34   |      |
| β-Aminobutyric acid         | 0.05  | 0.06   | 0.04   | 0.05  | 0.08   | 0.08  | 0.03  | 0.04  | 0.05   | 0.11   | 0.31   | 0.16   | 0.04   | 0.22   | 0.13   | 0.11   | 0.31   | 0.16  | 0.04  | 0.22   | 0.13  | 0.10   | 0.24   | 0.34  | < LOD  | < LOD  | 0.07  | 0.06   | 0.28   | 0.15   | 0.37   | 0.45   | 0.17   | 0.05   | 0.15   | 0.04   | 0.03   | 0.06   | 0.07   | 0.11   | 0.24   | 0.85   | < LOD  | 0.05   | 0.06   | 0.04   | 0.07   |      |
| Betaine                     | 66.98 | 140.87 | 182.97 | 95.57 | 200.42 | 83.57 | 98.78 | 87.28 | 175.03 | 105.10 | 125.28 | 120.80 | 129.70 | 121.77 | 96.77  | 105.27 | 69.61  | 68.71 | 50.69 | 97.33  | 93.02 | 171.27 | 104.00 | 60.81 | 65.68  | 97.58  | 49.86 | 257.84 | 107.98 | 152.80 | 122.54 | 162.11 | 140.50 | 143.02 | 153.61 | 175.18 | 139.25 | 159.27 | 136.83 | 296.08 | 106.21 | 231.37 | 133.82 | 176.60 | 144.53 | 176.83 | 107.17 |      |
| Carnosine                   | 4.91  | 5.78   | 6.21   | 8.12  | 9.61   | 4.86  | 6.18  | 5.62  | 7.98   | 5.83   | 7.97   | 7.24   | 5.58   | 12.84  | 8.74   | 6.81   | 7.41   | 8.52  | 5.90  | 8.57   | 8.16  | 16.00  | 8.14   | 10.66 | 11.63  | 8.74   | 8.73  | 9.43   | 3.30   | 12.53  | 4.74   | 4.81   | 12.43  | 10.51  | 5.33   | 7.91   | 5.36   | 9.00   | 22.34  | 12.43  | 9.02   | 9.03   | 9.54   | 10.41  | 12.84  | 14.05  | 10.71  |      |
| Citrulline                  | 40.52 | 71.27  | 36.13  | 19.99 | 39.69  | 25.48 | 65.34 | 34.37 | 48.98  | 64.24  | 39.56  | 104.32 | 118.60 | 45.90  | 148.24 | 107.01 | 63.71  | 57.43 | 42.21 | 70.78  | 34.36 | 79.31  | 70.88  | 61.45 | 86.98  | 84.03  | 42.21 | 49.96  | 48.21  | 75.55  | 84.88  | 31.32  | 159.23 | 49.42  | 110.91 | 91.47  | 95.10  | 47.77  | 44.99  | 161.72 | 74.12  | 103.66 | 83.04  | 45.72  | 105.74 | 86.87  | 82.52  |      |
| Crotonine                   | 49.72 | 62.91  | 103.47 | 64.33 | 79.48  | 3.39  | 51.68 | 49.17 | 88.31  | 67.82  | 88.97  | 62.80  | 53.97  | 75.77  | 95.65  | 78.30  | 101.92 | 66.45 | 79.28 | 83.11  | 63.80 | 183.27 | 75.80  | 80.95 | 67.13  | 79.28  | 74.90 | 72.39  | 74.25  | 53.42  | 98.45  | 64.00  | 62.69  | 63.78  | 46.45  | 60.51  | 52.12  | 80.28  | 75.86  | 69.48  | 115.81 | 64.87  | 70.07  | 85.58  | 80.38  | 72.53  |        |      |
| Cystine                     | 11.61 | 30.15  | 12.84  | 19.75 | 31.35  | 13.95 | 28.41 | 19.41 | 37.03  | 24.58  | 18.72  | 17.26  | 18.88  | 20.18  | 26.58  | 26.30  | 16.37  | 15.87 | 11.61 | 27.86  | 18.42 | 17.81  | 28.74  | 24.91 | 24.23  | 17.51  | 13.00 | 35.76  | 11.66  | 19.74  | 19.30  | 10.18  | 20.78  | 27.62  | 20.90  | 27.59  | 34.88  | 37.04  | 32.56  | 30.54  | 30.84  | 20.91  | 30.91  | 34.54  | 30.65  | 30.51  | 27.64  |      |
| Homoarginine                | 2.82  | 4.08   | 2.34   | 2.05  | 5.74   | 2.45  | 2.65  | 2.53  | 1.64   | 2.35   | 4.49   | 3.94   | 2.45   | 2.27   | 3.64   | 2.01   | 1.51   | 1.97  | 2.38  | 6.43   | 2.76  | 7.19   | 0.97   | 6.43  | 4.03   | 4.28   | 1.47  | 1.23   | 1.91   | 0.87   | 3.46   | 4.41   | 5.13   | 5.45   | 5.07   | 2.69   | 3.16   | 3.98   | 4.29   | 5.11   | 3.58   | 4.29   | 5.11   | 3.58   | 4.29   | 5.11   | 3.58   | 4.29 |
| Homocysteine                | 3.20  | 8.44   | 6.98   | 4.94  | 8.81   | 4.77  | 5.64  | 4.29  | 7.59   | 7.08   | 8.33   | 6.05   | 5.31   | 6.68   | 8.37   | 6.69   | 6.50   | 7.97  | 9.42  | 14.52  | 3.72  | 8.00   | 10.51  | 6.54  | 12.08  | 10.97  | 5.58  | 6.99   | 3.92   | 5.94   | 5.75   | 3.55   | 9.77   | 17.84  | 4.80   | 9.89   | 11.51  | 8.76   | 8.33   | 9.69   | 9.06   | 12.64  | 8.80   | 8.60   | 13.49  | 10.89  | 7.05   |      |
| Kynurenine                  | 2.74  | 7.71   | 1.16   | 5.63  | 7.84   | 1.98  | 3.21  | 1.82  | 5.72   | 2.88   | 2.37   | 2.44   | 2.10   | 5.39   | 3.65   | 2.90   | 4.18   | 1.90  | 1.47  | 4.63   | 3.65  | 2.94   | 5.81   | 0.74  | 2.47   | 3.24   | 2.23  | 7.79   | 2.05   | 2.73   | 2.82   | 1.58   | 3.18   | 3.61   | 2.65   | 1.78   | 2.43   | 4.40   | 1.017  | 2.49   | 2.71   | 2.29   | 2.51   | 2.42   | 2.92   | 3.08   |        |      |
| Methionine sulfoxide        | 0.91  | 2.63   | 0.77   | 0.64  | 2.40   | 0.87  | 1.08  | 0.70  | 1.59   | 1.07   | 2.78   | 2.24   | 4.60   | 1.55   | 2.54   | 2.52   | 1.26   | 0.57  | 1.61  | 3.62   | 3.39  | 1.95   | 3.77   | 0.59  | 1.51   | 3.99   | 0.64  | 2.36   | 0.48   | 1.26   | 0.85   | 0.37   | 1.75   | 1.93   | 1.40   | 2.77   | 3.08   | 2.78   | 1.67   | 3.46   | 2.71   | 1.88   | 1.71   | 1.49   | 3.15   | 1.96   | 1.30   |      |
| Oxithione                   | 49.05 | 88.22  | 27.93  | 46.33 | 120.36 | 53.48 | 94.35 | 62.34 | 85.16  | 107.07 | 73.80  | 163.50 | 189.62 | 102.76 | 188.95 | 150.26 | 78.01  | 67.12 | 73.51 | 100.78 | 41.93 | 40.76  | 105.27 | 97.18 | 105.88 | 167.17 | 65.59 | 64.33  | 42.24  | 64.04  | 82.77  | 147.49 | 241.85 | 79.71  | 140.79 | 152.15 | 137.39 | 94.47  | 76.10  | 152.21 | 199.13 | 87.47  | 115.64 | 94.29  | 125.52 | 132.44 | 142.32 |      |
| Phenylacetyl glycine        | 0.23  | 0.32   | 0.73   | 0.17  | 0.58   | 0.05  | 0.08  | 0.24  | 0.21   | 0.36   | 0.19   | 0.13   | 0.31   | 0.16   | 0.34   | 0.34   | 0.44   | 0.17  | 0.46  | 0.32   | 0.07  | 0.16   | 0.77   | 0.81  | 0.35   | 0.22   | 0.09  | 0.21   | 0.56   | 0.22   | 0.11   | 0.36   | 0.34   | 0.51   | 0.15   | 0.47   | 0.22   | 0.25   | 0.10   | 1.21   | 0.35   | 0.35   | 0.12   | 0.37   | 0.62   | 0.49   | 0.09   |      |
| Pro Betaine                 | 0.10  | 0.34   | 0.14   | 0.11  | 0.11   | 0.09  | 0.07  | 0.13  | 0.20   | 0.16   | 0.18   | 0.15   | 0.13   | 0.11   | 0.13   | 0.13   | 0.17   | 0.11  | 0.17  | 0.25   | 0.11  | 0.37   | 0.25   | 0.14  | 0.12   | 0.27   | 0.07  | 0.20   | 0.13   | 0.18   | 0.12   | 0.14   | 0.09   | 0.22   | 0.11   | 0.26   | 0.21   | 0.12   | 0.30   | 0.21   | 0.11   | 0.41   | 0.12   | 0.18   | 0.36   | 0.16   | 0.15   |      |
| Sarcosine                   | 1.33  | 3.59   | 2.23   | 2.89  | 6.05   | 1.98  | 2.56  | 4.70  | 12.52  | 3.91   | 2.50   | 4.49   | 3.30   | 5.89   | 6.33   | 5.21   | 2.33   | 2.77  | 3.47  | 7.46   | 4.44  | 3.04   | 10.07  | 2.09  | 4.02   | 2.93   | 1.92  | 8.34   | 1.70   | 4.44   | 2.57   | 1.24   | 4.66   | 3.80   | 4.88   | 6.67   | 6.26   | 4.96   | 7.35   | 5.55   | 4.35   | 4.65   | 4.83   | 12.14  | 7.66   | 6.42   |        |      |

|                                    |       |       |       |       |        |       |        |       |       |       |        |        |       |        |        |        |        |        |       |        |       |        |       |        |        |       |       |       |       |       |       |       |        |       |       |       |       |       |       |       |        |        |        |       |        |        |       |
|------------------------------------|-------|-------|-------|-------|--------|-------|--------|-------|-------|-------|--------|--------|-------|--------|--------|--------|--------|--------|-------|--------|-------|--------|-------|--------|--------|-------|-------|-------|-------|-------|-------|-------|--------|-------|-------|-------|-------|-------|-------|-------|--------|--------|--------|-------|--------|--------|-------|
| p-Cresol sulfate                   | 0.72  | 1.39  | 0.69  | 0.37  | 1.97   | 0.20  | 0.17   | 0.32  | 0.91  | 2.41  | 0.27   | 0.14   | 0.17  | 0.65   | 3.80   | 1.78   | 1.85   | 1.19   | 0.60  | 1.52   | 0.09  | 1.58   | 6.12  | 0.38   | 1.18   | 0.93  | 0.07  | 0.83  | 1.59  | 0.75  | 1.09  | 1.84  | 0.41   | 5.30  | 0.45  | 3.11  | 0.90  | 0.74  | 5.26  | 6.07  | 0.62   | 0.61   | 1.45   | 2.01  | 5.11   | 6.21   | 0.12  |
| DG(16:0_18:1)                      | 1.21  | 0.74  | 0.80  | <LOD  | 0.87   | 2.00  | 1.05   | 0.52  | 0.53  | 1.13  | 1.97   | 2.69   | 0.81  | 0.95   | 1.28   | 1.42   | 4.18   | 2.23   | 0.23  | 1.18   | 0.51  | 1.42   | 0.94  | 3.26   | 0.72   | 0.66  | 1.10  | 0.67  | <LOD  | 2.33  | 0.83  | <LOD  | 2.48   | 1.01  | 1.21  | 2.55  | 3.00  | 1.34  | 0.83  | 2.26  | 1.82   | 1.09   | 1.85   | 1.56  | 2.28   | 1.95   | 2.89  |
| HexCer(18:1/16:0)                  | 0.32  | 0.72  | 0.29  | 0.46  | 0.42   | 0.42  | 0.44   | 0.40  | 0.54  | 0.62  | 0.74   | 0.57   | 0.45  | 0.44   | 0.35   | 0.36   | 0.47   | 0.50   | 0.38  | 0.47   | 0.72  | 0.38   | 0.54  | 0.42   | 0.46   | 0.54  | 0.63  | 0.58  | 0.35  | 0.56  | 0.34  | 0.32  | 0.41   | 0.44  | 0.44  | 0.74  | 0.68  | 0.76  | 0.40  | 0.50  | 0.28   | 0.42   | 0.51   | 0.67  | 0.77   | 0.70   | 0.74  |
| Hex2Cer(18:1/24:1)                 | <LOD  | 1.07  | 0.04  | 0.06  | 0.07   | <LOD  | 0.05   | 0.05  | 0.07  | <LOD  | 0.08   | 0.08   | <LOD  | 0.08   | 0.06   | 0.08   | 0.02   | 0.03   | 0.05  | 0.05   | 0.09  | 0.05   | 0.04  | 0.07   | 0.06   | 0.06  | 0.08  | 0.04  | 0.06  | 0.04  | 0.06  | 0.07  | 0.05   | <LOD  | 0.05  | 0.06  | 0.08  | 0.08  | 0.07  | 0.06  | 0.05   | 0.08   | 0.08   | 0.08  | 0.08   | 0.08   | 0.08  |
| Docosahexaenoic acid (FA(22:6n3))  | 0.85  | 1.89  | 1.64  | 2.11  | 1.50   | 1.01  | 0.67   | 0.47  | 1.74  | 0.59  | 1.99   | 1.23   | 0.90  | 2.16   | <LOD   | 1.55   | 1.40   | 1.36   | 1.50  | 1.23   | 1.33  | 1.14   | 1.25  | 2.70   | 1.07   | 1.78  | 0.96  | 0.76  | 0.64  | 1.35  | 0.66  | 0.54  | 0.81   | 1.36  | 0.47  | 0.76  | 1.28  | 1.88  | 2.34  | 1.82  | 1.44   | 2.85   | 1.16   | 1.42  | 1.81   | 0.70   | 1.08  |
| Eicosapentaenoic acid (FA(25:5n3)) | 0.14  | 0.36  | 0.29  | 0.35  | 0.26   | 0.21  | 0.11   | <LOD  | 0.27  | 0.15  | 0.44   | 0.19   | 0.17  | 0.54   | <LOD   | <LOD   | 0.17   | 0.18   | 0.21  | 0.38   | 0.23  | 0.15   | 0.24  | 0.54   | 0.34   | 0.38  | 0.17  | 0.10  | 0.09  | 0.29  | 0.13  | <LOD  | 0.18   | 0.20  | <LOD  | 0.09  | 0.20  | 0.28  | 0.36  | 0.31  | 0.25   | 0.30   | 0.17   | 0.47  | 0.30   | 0.20   | 0.14  |
| Octadecenoic acid                  | 47.49 | 65.43 | 62.25 | 83.93 | 119.12 | 86.25 | 55.01  | <LOD  | 70.99 | 45.04 | 159.86 | 70.53  | <LOD  | 115.44 | 91.24  | 196.52 | 174.75 | 148.28 | <LOD  | <LOD   | <LOD  | 110.17 | <LOD  | 141.08 | <LOD   | 71.31 | 82.12 | 29.73 | 78.27 | 81.13 | 28.31 | <LOD  | 78.27  | 62.10 | 30.74 | 62.44 | 76.72 | 54.58 | 93.03 | 95.75 | 148.53 | 138.98 | 103.19 | 62.38 | 149.57 | 109.92 | 72.76 |
| HexCer(18:1/16:0)                  | 0.14  | 0.31  | 0.08  | 0.14  | 0.22   | 0.14  | 0.17   | 0.17  | 0.20  | 0.14  | 0.17   | 0.22   | 0.18  | 0.14   | 0.17   | 0.22   | 0.18   | 0.14   | 0.17  | 0.22   | 0.18  | 0.20   | 0.30  | 0.29   | 0.25   | 0.26  | 0.31  | 0.24  | 0.19  | 0.21  | 0.10  | 0.15  | 0.22   | 0.21  | 0.19  | 0.24  | 0.26  | 0.19  | 0.25  | 0.22  | 0.31   | 0.27   | 0.26   | 0.28  | 0.31   |        |       |
| HexCer(18:1/18:0)                  | 0.04  | 0.05  | <LOD  | <LOD  | 0.05   | 0.04  | <LOD   | 0.04  | 0.05  | 0.05  | 0.08   | 0.04   | <LOD  | <LOD   | 0.05   | 0.06   | 0.04   | 0.04   | 0.05  | 0.06   | 0.04  | 0.08   | 0.04  | 0.06   | 0.04   | 0.05  | 0.04  | <LOD  | <LOD  | 0.05  | <LOD  | <LOD  | <LOD   | <LOD  | 0.03  | 0.05  | 0.05  | <LOD  | 0.09  | 0.05  | 0.05   | 0.05   | 0.10   | 0.08  |        |        |       |
| HexCer(18:1/22:0)                  | <LOD  | 0.35  | <LOD  | 0.21  | 0.33   | 0.23  | 0.25   | <LOD  | 0.32  | 0.32  | 0.33   | 0.24   | <LOD  | <LOD   | 0.23   | 0.13   | 0.21   | 0.23   | 0.25  | 0.42   | 0.24  | 0.32   | 0.33  | 0.23   | 0.23   | 0.28  | 0.27  | 0.40  | 0.33  | 0.24  | <LOD  | 0.28  | 0.39   | 0.34  | 0.22  | 0.25  | 0.36  | 0.38  | 0.31  | 0.25  | <LOD   | 0.25   | 0.48   | 0.42  | 0.36   | 0.31   | 0.29  |
| Indoyl sulfate                     | 0.34  | 0.14  | 1.01  | 1.01  | 1.18   | 0.34  | 0.17   | 0.36  | 0.11  | 0.15  | 0.73   | 0.45   | <LOD  | <LOD   | 1.01   | 0.54   | 0.65   | 0.56   | 1.31  | 0.47   | 0.87  | 0.63   | 0.34  | 0.42   | 0.73   | 0.20  | 0.17  | 0.68  | 0.10  | 1.16  | 1.20  | 0.22  | 0.19   | 0.60  | 0.32  | <LOD  | 0.46  | 1.12  | 0.11  | 0.26  | 0.13   | 0.34   | 0.32   | 0.33  | <LOD   |        |       |
| lysoPC a C14:0                     | 7.10  | 6.41  | <LOD  | 3.19  | 3.39   | 3.68  | 7.82   | 2.69  | 2.70  | 6.85  | 12.91  | 9.37   | 5.99  | 4.63   | 4.18   | 2.29   | 9.58   | 8.12   | 4.03  | 5.31   | <LOD  | 8.06   | 6.18  | 7.73   | 7.17   | 9.71  | 5.33  | 2.99  | 2.33  | 5.18  | 3.58  | <LOD  | 7.63   | 4.65  | 4.31  | 4.96  | 5.17  | 4.41  | 4.58  | 10.62 | 4.12   | 8.10   | 6.10   | 3.80  | 6.84   | 4.50   | 5.31  |
| lysoPC a C16:0                     | 9.20  | 21.23 | 4.08  | 8.50  | 16.00  | 10.89 | 19.11  | 10.23 | 17.47 | 30.29 | 31.32  | 24.25  | 13.78 | 21.99  | 10.52  | 5.12   | 17.70  | 12.19  | 24.93 | 5.26   | 14.31 | 30.53  | 16.51 | 26.66  | 21.75  | 14.30 | 17.17 | 6.87  | 15.93 | 8.09  | 4.11  | 15.44 | 20.12  | 8.31  | 23.97 | 23.31 | 19.95 | 23.08 | 25.35 | 8.38  | 17.57  | 27.86  | 22.30  | 27.43 | 17.86  | 16.81  |       |
| lysoPC a C16:1                     | 1.92  | 1.92  | 1.78  | 1.59  | 2.73   | 2.05  | 3.47   | 1.64  | 0.93  | 2.21  | 6.69   | 3.39   | 2.33  | 1.45   | 2.29   | 1.16   | 4.70   | 1.45   | 2.55  | 0.61   | 4.41  | 1.91   | 4.82  | 3.34   | 4.95   | 4.05  | 1.57  | 1.35  | 2.91  | 1.42  | 0.70  | 4.03  | 0.94   | 1.63  | 1.09  | 1.60  | 2.12  | 1.45  | 5.00  | 1.37  | 3.98   | 1.15   | 1.12   | 0.98  | 1.61   | 2.96   |       |
| lysoPC a C17:0                     | 0.46  | 0.61  | 0.26  | 0.40  | 0.62   | 0.47  | 0.81   | 0.58  | 0.35  | 1.29  | 1.12   | 0.82   | 0.65  | 0.83   | 0.39   | 1.23   | 0.81   | 0.83   | 0.49  | 1.34   | 0.30  | 1.58   | 0.71  | 0.74   | 1.22   | 0.99  | 0.68  | 0.52  | 0.28  | 1.03  | 0.36  | 0.22  | 0.60   | 0.62  | 0.29  | 0.57  | 0.83  | 0.78  | 0.54  | 0.77  | 0.36   | 0.70   | 0.61   | 0.43  | 0.55   | 0.79   | 0.94  |
| lysoPC a C18:0                     | 5.05  | 11.31 | 2.02  | 4.26  | 10.71  | 6.95  | 12.28  | 8.53  | 11.35 | 28.09 | 15.00  | 13.21  | 7.96  | 10.62  | 5.55   | 2.67   | 9.78   | 11.69  | 5.68  | 22.68  | 4.38  | 4.62   | 11.83 | 18.73  | 14.33  | 10.35 | 10.36 | 3.51  | 13.45 | 3.27  | 2.18  | 7.68  | 13.57  | 4.04  | 19.15 | 18.04 | 12.75 | 14.27 | 14.38 | 4.92  | 6.27   | 1.74   | 13.71  | 18.08 | 16.51  | 13.75  |       |
| lysoPC a C18:1                     | 15.77 | 22.97 | 4.29  | 13.16 | 22.96  | 20.95 | 27.70  | 18.25 | 10.80 | 30.45 | 42.36  | 33.89  | 19.36 | 19.77  | 10.24  | 4.81   | 35.49  | 41.19  | 13.33 | 37.06  | 4.45  | 19.62  | 25.31 | 49.66  | 41.17  | 34.34 | 37.29 | 14.24 | 5.77  | 33.58 | 6.55  | 35.2  | 26.17  | 19.15 | 8.38  | 21.20 | 28.22 | 22.44 | 16.89 | 39.81 | 9.72   | 22.41  | 28.43  | 17.50 | 25.11  | 33.13  |       |
| lysoPC a C18:2                     | 12.83 | 48.12 | <LOD  | 10.16 | 15.64  | 12.57 | 15.50  | 8.73  | 12.26 | 24.44 | 27.09  | 18.23  | 8.28  | 22.12  | 3.75   | 1.97   | 21.05  | 26.48  | 3.08  | 47.67  | 2.44  | 6.86   | 48.41 | 17.84  | 46.82  | 26.27 | 32.27 | 13.11 | <LOD  | 30.26 | 2.53  | <LOD  | 11.42  | 39.05 | 37.5  | 43.80 | 50.14 | 13.07 | 29.22 | 24.96 | 5.65   | 8.60   | 75.13  | 34.69 | 75.27  | 47.38  | 23.15 |
| lysoPC a C20:3                     | 0.25  | 0.25  | 0.25  | 0.63  | 1.46   | 1.35  | 1.52   | 0.56  | 0.75  | 1.59  | 2.02   | 2.16   | 1.35  | 1.07   | 0.61   | 0.48   | 2.04   | 2.58   | 0.71  | 2.22   | 0.28  | 1.21   | 1.61  | 2.38   | 3.74   | 2.20  | 2.04  | 1.01  | 0.44  | 1.75  | 0.39  | 0.31  | 1.39   | 1.05  | 0.50  | 1.43  | 1.51  | 1.76  | 1.11  | 0.15  | 0.75   | 1.63   | 1.56   | 1.08  | 1.39   | 22.1   | 1.35  |
| lysoPC a C20:4                     | 1.23  | 2.32  | 0.33  | 1.09  | 2.71   | 1.82  | 2.39   | 0.76  | 0.96  | 2.10  | 3.56   | 2.59   | 1.76  | 1.78   | 0.63   | 0.47   | 1.85   | 3.19   | 0.76  | 3.33   | 0.36  | 1.79   | 2.36  | 2.15   | 6.59   | 3.37  | 2.98  | 2.07  | 0.62  | 2.24  | 0.41  | 0.48  | 1.85   | 1.46  | 0.53  | 2.06  | 2.43  | 2.26  | 2.13  | 0.77  | 0.63   | 1.77   | 2.99   | 1.96  | 2.50   | 2.64   | 1.37  |
| lysoPC a C28:1                     | <LOD  | 0.14  | <LOD  | <LOD  | <LOD   | <LOD  | 0.32   | 0.10  | 0.09  | 0.24  | 0.36   | 0.20   | 0.20  | <LOD   | <LOD   | <LOD   | 0.18   | 0.23   | 0.17  | 0.25   | <LOD  | <LOD   | 0.16  | 0.18   | 0.17   | 0.38  | 0.18  | <LOD  | 0.30  | <LOD  | 0.32  | <LOD  | <LOD   | 0.25  | 0.16  | <LOD  | 0.26  | 0.24  | 0.19  | 0.13  | 0.21   | <LOD   | <LOD   | 0.27  | 0.10   | 0.17   | 0.18  |
| PC aa C28:1                        | 0.63  | 1.18  | 0.22  | 0.62  | 0.53   | 0.44  | 1.15   | 0.97  | 0.79  | 1.57  | 1.63   | 1.09   | 0.67  | 0.94   | 0.65   | 0.59   | 1.45   | 1.24   | 0.53  | 1.82   | 0.88  | 0.54   | 1.36  | 0.95   | 2.13   | 1.04  | 1.14  | 1.21  | 0.34  | 1.32  | 0.40  | 0.33  | 1.03   | 1.17  | 0.49  | 2.19  | 1.39  | 1.08  | 1.25  | 1.26  | 0.41   | 0.43   | 1.90   | 1.52  | 1.84   | 2.03   | 1.71  |
| PC aa C30:0                        | 2.96  | 4.16  | 1.82  | 2.16  | 2.06   | 1.71  | 3.35   | 2.54  | 2.63  | 3.95  | 6.46   | 4.54   | 2.39  | 2.92   | 3.10   | 3.39   | 6.02   | 4.65   | 1.87  | 5.25   | 2.31  | 3.91   | 3.21  | 4.29   | 4.88   | 3.44  | 2.94  | 3.04  | 2.15  | 3.66  | 2.82  | 1.34  | 4.38   | 3.35  | 2.56  | 4.98  | 4.74  | 5.08  | 4.15  | 5.60  | 2.10   | 3.91   | 5.00   | 4.16  | 5.98   | 5.72   | 5.05  |
| PC aa C30:1                        | 2.91  | 7.57  | 1.57  | 3.84  | 3.72   | 3.68  | 4.04   | 3.12  | 4.17  | 4.99  | 11.62  | 8.49   | 3.72  | 4.99   | 1.16   | 3.24   | 4.69   | 7.51   | 3.57  | 1.80   | 6.41  | 3.24   | 4.49  | 5.70   | 6.27   | 4.80  | 3.20  | 3.20  | 2.66  | 3.57  | 6.95  | 4.99  | 3.27   | 3.35  | 5.57  | 4.20  | 6.26  | 4.70  | 6.97  | 6.06  | 6.43   | 6.22   | 6.30   | 7.21  | 7.90   | 7.96   |       |
| PC aa C32:1                        | 5.97  | 7.02  | 0.63  | 4.60  | 4.06   | 3.93  | 9.35   | 4.87  | 3.22  | 4.45  | 17.49  | 12.12  | 6.42  | 3.44   | 15.44  | 16.21  | 14.66  | 12.80  | 9.75  | 8.11   | 5.50  | 17.60  | 5.05  | 17.95  | 10.31  | 1.99  | 7.36  | 4.16  | 7.87  | 6.66  | 8.75  | 5.61  | 14.94  | 3.31  | 11.73 | 7.34  | 12.28 | 7.43  | 3.94  | 12.64 | 6.19   | 12.59  | 4.96   | 5.75  | 4.64   | 6.57   | 11.61 |
| PC aa C32:2                        | 2.14  | 3.97  | 0.92  | 0.99  | 0.88   | 1.00  | 1.96   | 1.72  | 0.57  | 1.59  | 4.50   | 3.18   | 1.30  | 1.31   | 1.20   | 1.26   | 2.35   | 1.83   | 0.72  | 2.22   | 0.83  | 1.40   | 1.22  | 1.77   | 2.14   | 1.50  | 1.33  | 0.83  | 0.97  | 1.96  | 1.60  | 0.63  | 2.97   | 2.29  | 2.09  | 4.36  | 3.22  | 1.49  | 1.66  | 2.37  | 1.17   | 1.74   | 3.66   | 1.82  | 3.54   | 3.24   | 3.33  |
| PC aa C32:3                        | 0.39  | 1.27  | 0.08  | 0.28  | 0.21   | 0.26  | 0.27   | 0.41  | 0.44  | 0.51  | 0.63   | 0.44   | 0.19  | 0.52   | 0.19   | 0.14   | 0.69   | 0.61   | 0.16  | 1.60   | 0.52  | 0.60   | 0.35  | 1.16   | 0.54   | 0.67  | 0.30  | 0.15  | 0.78  | 0.14  | 0.08  | 0.39  | 0.91   | 0.19  | 1.45  | 1.10  | 0.47  | 1.33  | 0.56  | 0.18  | 0.19   | 1.62   | 1.08   | 1.71  | 1.31   | 1.11   |       |
| PC aa C34:1                        | 46.35 | 78.44 | 59.33 | 40.32 | 46.52  | 44.49 | 109.09 | 66.78 | 47.41 | 81.07 | 124.72 | 118.29 | 61.03 | 49.34  | 113.57 | 108.27 | 108.67 | 110.14 | 98.65 | 109.60 | 59.06 | 125.31 | 66.68 | 143.29 | 104.10 | 82.65 | 62.64 | 55.73 | 70.91 | 66.43 | 66.42 | 67.47 | 113.39 |       |       |       |       |       |       |       |        |        |        |       |        |        |       |

|             |       |       |       |       |       |       |       |       |       |       |       |       |       |       |       |       |        |       |       |       |       |       |       |       |       |       |       |       |       |       |       |       |       |       |       |        |       |       |       |       |       |       |       |       |       |       |       |      |
|-------------|-------|-------|-------|-------|-------|-------|-------|-------|-------|-------|-------|-------|-------|-------|-------|-------|--------|-------|-------|-------|-------|-------|-------|-------|-------|-------|-------|-------|-------|-------|-------|-------|-------|-------|-------|--------|-------|-------|-------|-------|-------|-------|-------|-------|-------|-------|-------|------|
| SM(OH)C161  | 1.10  | 1.78  | 0.74  | 1.19  | 1.03  | 0.79  | 1.30  | 1.55  | 1.17  | 2.51  | 1.94  | 1.85  | 1.14  | 1.81  | 1.40  | 1.36  | 2.16   | 2.15  | 1.60  | 3.80  | 2.04  | 1.36  | 2.10  | 1.88  | 3.42  | 1.89  | 1.99  | 1.95  | 0.95  | 1.65  | 0.82  | 0.90  | 1.51  | 1.99  | 1.19  | 2.33   | 2.00  | 1.69  | 2.04  | 2.40  | 0.94  | 1.12  | 2.48  | 2.20  | 3.08  | 3.25  | 3.48  |      |
| SM(OH)C161  | 0.51  | 0.74  | 0.35  | 0.65  | 0.50  | 0.38  | 0.49  | 0.80  | 0.53  | 1.12  | 0.75  | 0.76  | 0.48  | 0.73  | 0.68  | 0.69  | 0.97   | 0.99  | 0.81  | 1.63  | 1.08  | 0.71  | 0.71  | 0.82  | 1.52  | 0.81  | 1.20  | 1.17  | 0.50  | 0.98  | 0.37  | 0.41  | 0.60  | 0.80  | 0.50  | 0.80   | 0.89  | 0.74  | 0.94  | 0.44  | 0.65  | 0.87  | 0.94  | 1.14  | 1.56  | 1.51  |       |      |
| SM(OH)C221  | 0.87  | 2.39  | 0.50  | 1.35  | 1.79  | 0.61  | 1.06  | 1.78  | 2.23  | 2.27  | 1.77  | 1.32  | 0.93  | 3.09  | 1.07  | 1.13  | 2.17   | 1.88  | 1.30  | 3.92  | 2.04  | 0.87  | 3.20  | 1.45  | 2.71  | 1.62  | 1.92  | 3.92  | 0.87  | 1.80  | 0.67  | 0.81  | 1.20  | 2.45  | 0.80  | 3.31   | 2.59  | 4.32  | 4.25  | 1.93  | 0.90  | 0.95  | 2.98  | 3.38  | 4.84  | 4.90  | 4.20  |      |
| SM(OH)C222  | 0.58  | 1.04  | 0.35  | 0.87  | 0.84  | 0.40  | 0.70  | 0.97  | 1.28  | 0.90  | 0.86  | 0.64  | 1.44  | 0.77  | 0.79  | 1.29  | 1.12   | 1.09  | 2.11  | 1.35  | 0.67  | 1.43  | 1.17  | 1.49  | 1.06  | 1.12  | 1.79  | 0.56  | 1.10  | 0.45  | 0.54  | 0.79  | 1.16  | 0.54  | 1.26  | 1.07   | 1.06  | 1.64  | 1.37  | 0.58  | 0.72  | 1.46  | 1.59  | 1.98  | 2.27  | 2.04  |       |      |
| SM(OH)C241  | 0.07  | 0.22  | 0.07  | 0.13  | 0.18  | 0.09  | 0.10  | 0.14  | 0.22  | 0.17  | 0.13  | 0.10  | 0.08  | 0.27  | 0.10  | 0.28  | 0.13   | 0.22  | 0.19  | 0.13  | 0.34  | 0.11  | 0.29  | 0.13  | 0.19  | 0.17  | 0.15  | 0.43  | 0.08  | 0.15  | 0.07  | 0.29  | 0.22  | 0.10  | 0.30  | 0.25   | 0.21  | 0.34  | 0.17  | 0.09  | 0.12  | 0.27  | 0.39  | 0.40  | 0.47  | 0.44  |       |      |
| SMC160      | 17.61 | 31.00 | 10.91 | 20.13 | 20.42 | 14.25 | 20.02 | 24.76 | 25.65 | 37.25 | 31.78 | 27.45 | 16.06 | 27.17 | 23.15 | 22.85 | 32.25  | 35.33 | 23.93 | 47.11 | 32.61 | 20.47 | 33.85 | 28.51 | 46.97 | 31.55 | 37.48 | 40.69 | 17.61 | 27.84 | 13.89 | 12.91 | 23.73 | 29.23 | 18.72 | 47.52  | 32.94 | 28.27 | 38.43 | 37.76 | 63.53 | 21.46 | 45.07 | 50.68 | 60.89 | 55.50 | 52.25 |      |
| SMC161      | 2.11  | 4.25  | 1.33  | 2.62  | 2.75  | 1.62  | 2.80  | 3.39  | 3.03  | 4.61  | 4.08  | 3.42  | 2.17  | 3.45  | 2.49  | 3.01  | 3.70   | 4.19  | 3.54  | 6.37  | 3.25  | 2.26  | 4.45  | 3.48  | 5.63  | 4.25  | 4.28  | 4.95  | 1.97  | 3.39  | 2.15  | 3.28  | 2.89  | 3.69  | 2.02  | 5.34   | 4.91  | 3.75  | 5.23  | 4.69  | 1.72  | 2.45  | 7.43  | 5.71  | 8.24  | 7.04  | 7.32  |      |
| SMC180      | 2.14  | 3.48  | 1.32  | 3.06  | 3.14  | 1.92  | 2.33  | 3.53  | 3.27  | 4.31  | 4.43  | 3.24  | 1.74  | 3.53  | 2.63  | 3.88  | 4.53   | 4.69  | 3.93  | 5.76  | 4.87  | 3.91  | 3.95  | 4.20  | 5.70  | 3.92  | 5.71  | 5.79  | 2.89  | 4.37  | 1.53  | 1.28  | 2.58  | 3.24  | 2.68  | 4.92   | 4.04  | 3.91  | 4.44  | 4.15  | 2.35  | 3.22  | 4.70  | 6.14  | 5.93  | 7.89  | 5.75  |      |
| SMC181      | 0.80  | 1.28  | 0.53  | 1.07  | 1.06  | 0.70  | 0.93  | 1.19  | 1.17  | 1.72  | 1.79  | 1.16  | 0.85  | 1.35  | 1.21  | 1.51  | 1.43   | 1.50  | 1.37  | 2.39  | 1.64  | 1.22  | 1.54  | 1.67  | 2.24  | 1.57  | 1.96  | 1.96  | 0.98  | 1.54  | 0.62  | 0.69  | 0.87  | 1.34  | 0.91  | 2.05   | 1.54  | 1.53  | 1.62  | 1.71  | 0.87  | 1.32  | 1.99  | 2.28  | 2.63  | 2.94  | 2.35  |      |
| SMC202      | 0.04  | 0.05  | <LOD  | 0.02  | 0.05  | <LOD  | 0.04  | 0.02  | 0.06  | 0.03  | 0.02  | 0.05  | 0.02  | 0.02  | 0.09  | 0.18  | 0.15   | 0.07  | 0.19  | 0.08  | 0.09  | 0.08  | 0.19  | 0.23  | 0.15  | 0.13  | 0.08  | 0.04  | 0.02  | 0.02  | <LOD  | 0.03  | 0.05  | <LOD  | 0.07  | 0.05   | 0.05  | 0.07  | 0.09  | 0.02  | 0.04  | 0.07  | 0.10  | 0.08  | 0.11  | 0.08  |       |      |
| SMC240      | 1.69  | 4.05  | 1.53  | 2.60  | 3.44  | 1.41  | 2.61  | 2.71  | 4.58  | 3.98  | 3.62  | 2.86  | 2.40  | 5.23  | 3.09  | 3.03  | 5.24   | 3.78  | 3.98  | 6.81  | 3.70  | 2.63  | 5.90  | 3.55  | 4.45  | 3.34  | 3.32  | 6.59  | 2.63  | 4.32  | 1.63  | 2.08  | 2.98  | 4.27  | 2.24  | 6.17   | 5.13  | 5.40  | 7.24  | 4.38  | 2.44  | 2.87  | 5.65  | 6.36  | 7.53  | 7.06  | 7.06  |      |
| SMC241      | 2.87  | 4.81  | 2.21  | 4.08  | 4.79  | 2.09  | 3.24  | 4.11  | 5.60  | 4.02  | 5.58  | 4.57  | 3.51  | 5.67  | 4.57  | 4.99  | 5.42   | 5.22  | 6.01  | 6.84  | 5.66  | 3.62  | 6.42  | 6.21  | 6.34  | 6.15  | 5.14  | 8.60  | 3.39  | 4.52  | 2.66  | 3.13  | 3.79  | 4.75  | 3.77  | 5.20   | 4.98  | 5.82  | 7.45  | 6.87  | 2.99  | 4.04  | 5.90  | 7.75  | 9.39  | 8.46  | 9.13  |      |
| SMC260      | 0.02  | 0.05  | 0.05  | 0.04  | 0.03  | 0.02  | 0.04  | 0.04  | 0.05  | 0.07  | 0.03  | 0.03  | 0.01  | 0.06  | <LOD  | 0.04  | 0.05   | 0.04  | 0.03  | 0.10  | 0.05  | 0.03  | 0.08  | 0.05  | 0.06  | 0.06  | 0.11  | 0.03  | 0.05  | <LOD  | <LOD  | 0.04  | 0.07  | 0.02  | 0.09  | 0.08   | 0.06  | 0.10  | 0.04  | 0.02  | 0.01  | 0.07  | 0.09  | 0.09  | 0.08  | 0.11  |       |      |
| SMC261      | 0.05  | 0.11  | 0.06  | 0.09  | 0.12  | 0.02  | 0.08  | 0.06  | 0.13  | 0.13  | 0.10  | 0.06  | 0.04  | 0.10  | 0.06  | 0.04  | 0.11   | 0.06  | 0.06  | 0.11  | 0.09  | 0.05  | 0.10  | 0.09  | 0.10  | 0.07  | 0.10  | 0.22  | 0.07  | 0.08  | 0.03  | 0.04  | 0.05  | 0.14  | 0.04  | 0.18   | 0.15  | 0.11  | 0.25  | 0.09  | 0.04  | 0.04  | 0.16  | 0.25  | 0.21  | 0.30  | 0.30  |      |
| TG(140_322) | 1.42  | 1.39  | 0.66  | <LOD  | <LOD  | 1.39  | 0.79  | <LOD  | <LOD  | 1.52  | 2.57  | <LOD  | <LOD  | 0.61  | 1.08  | 1.98  | 3.65   | 1.81  | 0.39  | 1.02  | 0.46  | 0.93  | 1.59  | 2.22  | 0.80  | 1.18  | 1.21  | <LOD  | <LOD  | 1.64  | 0.98  | <LOD  | 3.43  | 1.09  | 1.77  | 2.32   | 2.45  | 1.19  | 0.88  | 2.36  | 3.19  | 1.46  | 1.03  | 1.14  | 2.12  | 1.86  | 3.31  |      |
| TG(140_340) | 8.89  | 30.1  | 12.02 | <LOD  | 1.46  | 7.11  | 4.85  | 2.14  | 1.02  | 2.96  | 6.62  | 14.39 | 2.68  | 2.01  | 4.37  | 8.82  | 5.24   | 15.74 | 10.4  | 40.2  | 8.81  | 2.79  | 3.46  | 16.86 | 2.90  | 4.02  | 8.78  | 1.04  | <LOD  | 9.95  | 3.78  | <LOD  | 14.91 | 3.37  | 10.39 | 6.78   | 8.65  | 6.39  | 1.22  | 11.36 | 9.72  | 3.75  | 2.73  | 3.58  | 4.91  | 4.56  | 18.57 |      |
| TG(140_341) | 26.67 | 21.75 | 12.02 | 3.66  | 6.77  | 27.86 | 14.41 | 6.46  | 4.86  | 20.01 | 27.09 | 56.68 | 11.20 | 9.02  | 17.66 | 32.51 | 81.79  | 48.93 | 3.86  | 19.20 | 3.92  | 13.04 | 22.96 | 57.83 | 14.37 | 14.92 | 24.84 | 5.34  | 3.00  | 34.23 | 16.32 | 2.78  | 59.37 | 19.20 | 33.45 | 52.18  | 59.59 | 23.57 | 9.47  | 40.27 | 10.89 | 17.24 | 25.81 | 35.17 | 31.02 | 66.87 |       |      |
| TG(140_342) | 5.09  | 5.75  | 2.40  | <LOD  | 1.61  | 5.40  | 2.68  | 1.26  | 1.67  | 4.06  | 5.12  | 9.86  | 2.52  | 2.62  | 2.95  | 5.25  | 11.44  | 6.79  | 0.74  | 4.06  | 1.30  | 2.60  | 4.84  | 9.42  | 2.90  | 2.50  | 3.97  | 1.77  | <LOD  | 7.33  | 3.39  | <LOD  | 10.79 | 4.49  | 5.79  | 10.48  | 11.81 | 4.85  | 2.55  | 6.46  | 7.34  | 4.06  | 5.01  | 6.75  | 8.22  | 8.03  | 11.66 |      |
| TG(140_361) | 6.06  | 2.94  | 2.21  | <LOD  | 2.27  | 7.12  | 3.81  | 2.12  | <LOD  | 2.94  | 3.93  | 9.73  | 1.98  | 1.61  | 2.20  | 2.77  | 16.86  | 11.05 | <LOD  | 3.03  | 1.12  | 2.36  | 2.26  | 11.24 | 2.21  | 2.17  | 5.48  | 1.31  | <LOD  | 8.81  | 2.15  | <LOD  | 11.13 | 3.25  | 4.61  | 6.83   | 7.90  | 5.24  | 1.53  | 6.22  | 4.42  | 2.13  | 1.97  | 3.29  | 4.18  | 4.47  | 16.85 |      |
| TG(140_362) | 10.38 | 10.70 | 6.41  | 2.28  | 4.03  | 14.25 | 6.35  | 3.59  | 3.06  | 4.86  | 8.35  | 17.36 | 3.89  | 5.37  | 3.94  | 6.16  | 25.52  | 15.61 | 1.03  | 8.42  | 2.65  | 5.38  | 10.22 | 21.95 | 4.71  | 5.17  | 9.25  | 2.83  | <LOD  | 18.44 | 4.77  | <LOD  | 19.29 | 9.67  | 6.97  | 25.89  | 29.69 | 9.40  | 4.75  | 11.85 | 9.04  | 4.95  | 7.68  | 11.04 | 16.26 | 14.51 | 25.80 |      |
| TG(160_342) | 2.61  | 4.77  | 1.34  | <LOD  | <LOD  | 2.35  | 1.37  | <LOD  | 1.52  | 2.79  | 1.74  | 4.04  | <LOD  | 2.13  | 0.79  | 1.23  | 3.86   | 2.43  | 0.33  | 2.72  | 0.64  | 0.96  | 3.91  | 3.63  | 1.47  | 1.22  | 1.51  | 1.18  | <LOD  | 3.55  | 1.52  | <LOD  | 3.99  | 3.99  | 2.42  | 8.87   | 9.78  | 1.94  | 2.13  | 2.15  | 2.40  | 1.84  | 3.31  | 4.33  | 5.49  | 15.8  | 4.39  |      |
| TG(160_281) | 8.98  | 3.83  | 2.25  | 0.70  | 1.05  | 5.81  | 4.27  | 1.64  | 0.72  | 4.57  | 6.19  | 14.59 | 2.06  | 2.35  | 2.83  | 6.51  | 15.46  | 9.58  | 0.75  | 4.32  | 1.03  | 3.02  | 4.00  | 11.38 | 25.1  | 3.52  | 6.26  | 0.64  | <LOD  | 8.12  | 3.48  | <LOD  | 15.95 | 4.00  | 8.70  | 8.43   | 8.68  | 4.93  | 1.69  | 5.71  | 8.11  | 3.15  | 3.38  | 4.01  | 6.31  | 6.01  | 18.05 |      |
| TG(160_282) | 1.14  | 0.96  | <LOD  | <LOD  | <LOD  | 0.52  | 0.47  | <LOD  | 0.80  | 0.70  | 1.53  | 0.31  | 0.47  | 0.44  | 0.70  | 1.51  | 1.07   | <LOD  | 0.69  | 0.23  | 0.62  | 0.91  | 1.15  | 0.48  | 0.42  | 0.71  | <LOD  | <LOD  | 1.02  | 0.42  | <LOD  | 1.65  | 1.04  | 0.94  | 1.62  | 1.82   | 0.51  | 0.31  | 0.65  | 0.97  | 0.46  | 0.55  | 0.84  | 1.17  | 1.21  | 1.84  |       |      |
| TG(160_302) | 1.67  | 12.39 | 0.50  | <LOD  | 1.19  | 1.17  | 0.84  | <LOD  | 1.28  | 2.23  | 2.27  | 1.57  | 1.32  | 0.93  | 3.09  | 1.07  | 1.13   | 2.17  | 1.88  | 1.30  | 3.92  | 2.04  | 0.87  | 3.20  | 1.45  | 2.71  | 1.62  | 1.92  | 3.92  | 0.87  | 1.80  | 0.67  | 0.81  | 1.20  | 2.45  | 0.80   | 3.31  | 2.59  | 4.32  | 4.25  | 1.93  | 0.90  | 0.95  | 2.98  | 3.38  | 4.84  | 4.90  | 4.20 |
| TG(160_320) | 33.84 | 29.78 | 10.38 | 4.20  | 8.96  | 37.45 | 21.62 | 9.41  | 7.62  | 33.44 | 49.47 | 89.66 | 16.57 | 10.93 | 45.48 | 78.31 | 127.79 | 82.34 | 7.45  | 38.57 | 3.62  | 17.45 | 35.76 | 94.04 | 16.48 | 18.88 | 35.90 | 8.42  | 5.84  | 39.69 | 24.27 | 4.59  | 86.29 | 29.88 | 73.50 | 77.11  | 98.69 | 35.88 | 11.66 | 62.72 | 61.94 | 33.61 | 39.22 | 44.47 | 63.07 | 65.85 | 99.94 |      |
| TG(160_321) | 34.16 | 24.63 | 14.18 | 4.83  | 9.51  | 39.58 | 21.50 | 9.70  | 7.74  | 30.45 | 42.15 | 78.85 | 16.16 | 11.22 | 30.84 | 78.31 | 145.99 | 66.62 | 6.16  | 21.96 | 5.12  | 19.35 | 32.02 | 78.60 | 14.84 | 18.72 | 37.98 | 8.91  | 4.83  | 47.66 | 25.87 | 5.04  | 84.54 | 22.16 | 52.63 | 56.85  | 64.95 | 33.58 | 9.56  | 48.24 | 50.20 | 29.98 | 20.13 | 29.78 | 38.02 | 41.91 | 92.88 |      |
| TG(160_322) | 4.85  | 5.66  | 2.32  | <LOD  | 1.81  | 6.44  | 3.08  | 1.46  | 1.87  | 4.01  | 5.65  | 9.83  | 2.40  | 2.89  | 4.44  | 7.13  | 12.41  | 7.10  | 0.97  | 4.23  | 1.28  | 3.20  | 4.89  | 10.02 | 1.72  | 2.97  | 4.22  | 2.01  | <LOD  | 7.03  | 3.93  | <LOD  | 11.30 | 4.42  | 7.17  | 11.57  | 11.74 | 4.75  | 2.36  | 6.52  | 9.00  | 5.45  | 4.72  | 7.08  | 7.60  | 7.08  | 11.25 |      |
| TG(160_341) | 5.22  | 1.43  | 2.61  | <LOD  | 1.49  | 4.64  | 2.66  | 1.59  | <LOD  | 2.52  | 5.12  | 9.55  | 2.51  | 1.19  | 4.39  | 3.68  | 15.88  | 9.18  | 1.01  | 2.88  | 1.03  | 3.46  | 0.93  | 13.46 | 1.72  | 3.09  | 4.93  | 1.04  | <LOD  | 7.63  | 3.29  | <LOD  | 9.63  | 1.12  | 6.18  | 1.69</ |       |       |       |       |       |       |       |       |       |       |       |      |
