# Supplementary material for: A Pilot Study on Across-Generation Impacts of Maternal Heat Stress on Blood Metabolites of Female Holstein Dairy Calves
Source: MDPI journal article supplement (doi:10.3390/metabo13040494), 2023-03-29
Supplement: s1 [file s1]

# Supplementary Materials:

**Table S2:** Effects of fixed effects in models 1-3 on metabolite concentrations of calves. The table includes log transformed Least-squares means (LSMeans) with corresponding SE, number of observations (n) and P-value, adjusted with Bonferroni correction. \* $p < 0.05$ ; \*\*  $p < 0.01$ ; \*\*\*  $p < 0.001$

| Metabolite   | Model | Fixed effect              | Effect class                    | LSMeans (log transformed) | SE      | <i>n</i> | <i>P</i> -value |
|--------------|-------|---------------------------|---------------------------------|---------------------------|---------|----------|-----------------|
| PC aa C34:1  |       | mTHI-class                | mTHI $\geq$ 60                  | 1.8021                    | 0.03793 | 14       | **              |
|              |       |                           | mTHI < 60                       | 1.9352                    | 0.02471 | 33       |                 |
| PC aa C38:3  |       | mTHI-class                | mTHI $\geq$ 60                  | 0.9060                    | 0.03208 | 14       | ***             |
|              |       |                           | mTHI < 60                       | 1.0612                    | 0.02090 | 33       |                 |
| PC aa C38:4  |       | mTHI-class                | mTHI $\geq$ 60                  | 1.0458                    | 0.03927 | 14       | **              |
|              |       |                           | mTHI < 60                       | 1.1837                    | 0.02558 | 33       |                 |
| PC ae C38:3  |       | mTHI-class                | mTHI $\geq$ 60                  | -0.1098                   | 0.03757 | 14       | ***             |
|              |       |                           | mTHI < 60                       | 0.05282                   | 0.02447 | 33       |                 |
| PC ae C40:4  | 1     | mTHI-class                | mTHI $\geq$ 60                  | -0.6114                   | 0.03358 | 14       | ***             |
|              |       |                           | mTHI < 60                       | -0.4690                   | 0.02187 | 33       |                 |
| CE(20:3)     |       | mTHI-class                | mTHI $\geq$ 60                  | 0.3059                    | 0.03911 | 14       | ***             |
|              |       |                           | mTHI < 60                       | 0.5256                    | 0.02548 | 33       |                 |
| CE(20:4)     |       | mTHI-class                | mTHI $\geq$ 60                  | 1.0951                    | 0.04316 | 14       | ***             |
|              |       |                           | mTHI < 60                       | 1.2939                    | 0.02811 | 33       |                 |
| CE(22:5)     |       | mTHI-class                | mTHI $\geq$ 60                  | -0.4238                   | 0.03971 | 13       | *               |
|              |       |                           | mTHI < 60                       | -0.2981                   | 0.02492 | 33       |                 |
| H1           |       | mTHI-class                | mTHI $\geq$ 60                  | 3.7963                    | 0.02755 | 14       | **              |
|              |       |                           | mTHI < 60                       | 3.8943                    | 0.01795 | 33       |                 |
| PC aa C38:1  | 2     | mTHI-class                | mTHI $\geq$ 60                  | -0.8397                   | 0.1256  | 14       | **              |
|              |       |                           | mTHI < 60                       | -0.3794                   | 0.1001  | 33       |                 |
|              |       | calving condition         | no birth assistance             | -0.5899                   | 0.07153 | 35       | n.s.            |
|              |       |                           | minor birth assistance/dystocia | -0.6292                   | 0.1667  | 6        |                 |
|              |       | mTHI-class                | mTHI $\geq$ 60                  | -0.3700                   | 0.1428  | 14       | *               |
|              |       |                           | mTHI < 60                       | -0.02230                  | 0.1138  | 33       |                 |
| P-Cresol-SO4 |       | calving condition         | no birth assistance             | -0.1092                   | 0.08133 | 35       | n.s.            |
|              |       |                           | minor birth assistance/dystocia | -0.2832                   | 0.1895  | 6        |                 |
| SM C18:0     | 3     | mTHI-class                | mTHI $\geq$ 60                  | 0.4269                    | 0.03276 | 14       | ***             |
|              |       |                           | mTHI < 60                       | 0.5985                    | 0.02061 | 33       |                 |
|              |       | age at blood sampling (d) | 1                               | 0.3809                    | 0.04402 | 8        | ***             |
|              |       |                           | 2 to 3                          | 0.4519                    | 0.03292 | 13       |                 |
|              |       |                           | 4 to 5                          | 0.5875                    | 0.03292 | 13       |                 |
|              |       |                           | 6 to 7                          | 0.6304                    | 0.03423 | 13       |                 |
|              |       | mTHI-class                | mTHI $\geq$ 60                  | 0.003073                  | 0.03375 | 14       | ***             |
|              |       |                           | mTHI < 60                       | 0.1659                    | 0.02123 | 33       |                 |
| SM C18:1     |       | age at blood sampling (d) | 1                               | -0.05998                  | 0.04535 | 8        | ***             |
|              |       |                           | 2 to 3                          | 0.02738                   | 0.03391 | 13       |                 |
|              |       |                           | 4 to 5                          | 0.1536                    | 0.03391 | 13       |                 |
|              |       |                           | 6 to 7                          | 0.2168                    | 0.03526 | 13       |                 |

|             |                                 |                |         |         |    |     |
|-------------|---------------------------------|----------------|---------|---------|----|-----|
| SM C24:1    | mTHI-class                      | mTHI $\geq$ 60 | 0.5739  | 0.03056 | 14 | *** |
|             |                                 | mTHI < 60      | 0.7165  | 0.01923 | 33 |     |
|             | age at blood<br>sampling<br>(d) | 1              | 0.5202  | 0.04106 | 8  | *** |
|             |                                 | 2 to 3         | 0.6015  | 0.03071 | 13 |     |
|             |                                 | 4 to 5         | 0.6841  | 0.03071 | 13 |     |
|             |                                 | 6 to 7         | 0.7748  | 0.03193 | 13 |     |
| PC ae C30:2 | mTHI-class                      | mTHI $\geq$ 60 | -1.5266 | 0.04253 | 14 | *** |
|             |                                 | mTHI < 60      | -1.3481 | 0.02676 | 33 |     |
|             | age at blood<br>sampling<br>(d) | 1              | -1.5965 | 0.05715 | 8  | **  |
|             |                                 | 2 to 3         | -1.4206 | 0.04274 | 13 |     |
|             |                                 | 4 to 5         | -1.3613 | 0.04274 | 13 |     |
|             |                                 | 6 to 7         | -1.3709 | 0.04444 | 13 |     |

---
